# Supplementary material for: Venetoclax for Acute Myeloid Leukemia in Pediatric Patients: A Texas Medical Center Experience
Source: MDPI journal article supplement (doi:10.3390/cancers15071983), 2023-03-26
Supplement: s1 [file s1]

**Table S1. Univariate Analysis (CR vs CRi vs PR vs NR)**

| Variable                              | CR<br>(N=10) | CRi<br>(N=6) | PR<br>(N=2) | NR<br>(N=22) | <i>P</i> |
|---------------------------------------|--------------|--------------|-------------|--------------|----------|
| Median age (range)                    | 14 (1 – 20)  | 20 (17 – 21) | 11 (5 – 16) | 17 (1 – 21)  | 0.2      |
| N Female (%)                          | 5 (50%)      | 2 (33%)      | 1 (50%)     | 8 (36%)      | 0.7      |
| N <i>KMT2Ar</i> (%)                   | 4 (40%)      | 2 (33%)      | 1 (50%)     | 9 (41%)      | 0.9      |
| N Adverse genetics (%)                | 5 (50%)      | 4 (67%)      | 2 (100%)    | 16 (73%)     | 0.1      |
| Median prior lines of therapy (range) | 2 (1 – 5)    | 2 (1 – 3)    | 2 (1 – 2)   | 3 (1 – 7)    | 0.2      |
| N Prior HSCT (%)                      | 4 (40%)      | 1 (17%)      | 1 (50%)     | 8 (36%)      | 0.5      |
| N HMA + Ven (%)                       | 9 (90%)      | 3 (50%)      | 2 (100%)    | 16 (73%)     | 0.3      |

**Table S2. Univariate Analysis (Response [CR+CRi+PR] vs No response)**

| Variable                              | Response<br>(N=18) | No response (N=22) | <i>P</i> |
|---------------------------------------|--------------------|--------------------|----------|
| Median age (range)                    | 18 (1 – 21)        | 17 (1 – 21)        | 0.2      |
| N Female (%)                          | 8 (44%)            | 8 (36%)            | 0.8      |
| N <i>KMT2Ar</i> (%)                   | 8 (44%)            | 8 (36%)            | 0.8      |
| N Adverse genetics (%)                | 14 (78%)           | 13 (59%)           | 0.7      |
| Median prior lines of therapy (range) | 2 (1 – 5)          | 3 (1 – 7)          | 0.1      |
| N prior HSCT (%)                      | 6 (33%)            | 8 (36%)            | 0.8      |
| N HMA + Ven (%)                       | 14 (78%)           | 16 (73%)           | 0.7      |

To eliminate the impact of confounding variables, factors that had a *P* value of  $\leq 0.2$  in univariate analysis were included in a multivariable logistic regression (This only applied to binary response)

**Table S3. Multivariate Analysis (Response vs No Response)**

| Variable               | OR   | 95% CI      | <i>P</i> |
|------------------------|------|-------------|----------|
| Age                    | 1.03 | 0.93 – 1.13 | 0.6      |
| Prior lines of therapy | 0.74 | 0.46 – 1.17 | 0.2      |
